# Supplementary material
Source: Springer Nature journal article supplement (https://www.springermedizin.de/resource/supplementary/13075_2009_2798_MOESM4_ESM.PDF/9692908)
Supplement: MOESM4 [file 9692908]

CRT

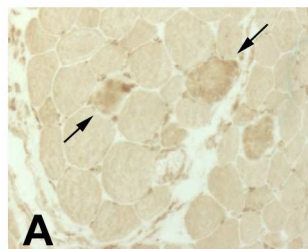

CHOP

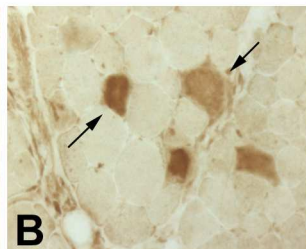

C9

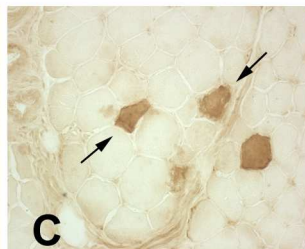

$\epsilon$ My

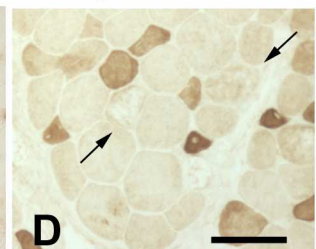

Additional File 4
